# Supplementary material for: Changes of Symptoms of Anxiety, Depression, and Fatigue in Cancer Patients 3 Months after a Video-Based Intervention
Source: MDPI journal article supplement (doi:10.3390/ijerph20206933), 2023-10-17
Supplement: s1 [file s1]

**Supplement - Table S1.** Changes in anxiety, depression, and fatigue and from baseline to three-month follow-up by video-usage or exercise practice.

|                     |                |    | ANOVA                          |                        |                     |                         |                     |              |
|---------------------|----------------|----|--------------------------------|------------------------|---------------------|-------------------------|---------------------|--------------|
| Outcomes            |                |    | Baseline/pre-intervention (T1) | Post-intervention (T2) | After 3 months (T3) | Time                    | Group               | Time x Group |
|                     | Group          | n  | Mean (SD)                      | Mean (SD)              | Mean (SD)           | $\eta^2$ , p            | $\eta^2$ , p        | $\eta^2$ , p |
| Anxiety             | Users          | 66 | 6.50 (4.47)                    | 6.30 (4.57)            | 6.05 (4.39)         | 0.008, 0.46             | <0.001, 0.86        | 0.001, 0.85  |
|                     | Non-users      | 29 | 6.45 (5.83)                    | 5.90 (5.45)            | 6.00 (5.39)         |                         |                     |              |
| Fear of progression | Users          | 60 | 32.90 (9.14)                   | 32.13 (10.03)          | 30.77 (9.77)        | <b>0.06, 0.004</b>      | <b>0.053, 0.028</b> | 0.001, 0.89  |
|                     | Non-users      | 31 | 28.87 (9.94)                   | 27.45 (9.18)           | 26.42 (8.43)        |                         |                     |              |
| Depression          | Users          | 59 | 6.80 (4.35)                    | 6.00 (4.89)            | 5.49 (3.91)         | <b>0.104, &lt;0.001</b> | 0.01, 0.37          | 0.007, 0.54  |
|                     | Non-users      | 29 | 6.24 (5.22)                    | 5.34 (4.87)            | 4.17 (4.03)         |                         |                     |              |
| Fatigue             | Users          | 66 | 37.50 (19.94)                  | 34.01 (24.86)          | 34.26 (23.75)       | <b>0.049, 0.011</b>     | 0.011, 0.32         | 0.012, 0.32  |
|                     | Non-users      | 28 | 34.82 (25.15)                  | 30.65 (23.78)          | 26.09 (24.14)       |                         |                     |              |
| Anxiety             | Practicers     | 38 | 6.95 (4.57)                    | 6.26 (3.68)            | 5.92 (3.92)         | 0.015, 0.31             | 0.021, 0.20         | 0.008, 0.49  |
|                     | Non-practicers | 44 | 5.34 (4.69)                    | 5.14 (5.03)            | 5.23 (4.62)         |                         |                     |              |
| Fear of progression | Practicers     | 34 | 32.35 (7.46)                   | 30.91 (7.29)           | 28.85 (7.36)        | <b>0.089, 0.001</b>     | 0.023, 0.20         | 0.019, 0.26  |
|                     | Non-practicers | 41 | 28.68 (9.72)                   | 28.61 (10.69)          | 27.34 (9.40)        |                         |                     |              |
| Depression          | Practicers     | 34 | 7.53 (4.15)                    | 6.09 (4.09)            | 5.53 (3.45)         | <b>0.117, &lt;0.001</b> | <b>0.089, 0.010</b> | 0.009, 0.52  |
|                     | Non-practicers | 39 | 4.90 (4.13)                    | 4.10 (4.25)            | 3.72 (3.36)         |                         |                     |              |
| Fatigue             | Practicers     | 37 | 40.02 (19.71)                  | 34.23 (20.49)          | 33.48 (22.46)       | <b>0.047, 0.03</b>      | 0.029, 0.13         | 0.005, 0.63  |
|                     | Non-practicers | 44 | 31.06 (22.02)                  | 28.72 (25.93)          | 27.15 (24.52)       |                         |                     |              |

ANOVA, analysis of variance; SD, standard deviation;  $\eta^2$ , effect size.

Bold figures indicate: significant effects ( $p < 0.05$ ).
